# Supplementary material
Source: PubMed Central journal article supplement (PMC5124492)
Supplement: NIHMS829952-supplement-Supp.pdf [file NIHMS829952-supplement-Supp.pdf]

**Item S1.** Detailed methods, table *a*, and figure *a*.

## **Detailed Methods**

### **Patients**

We prospectively recruited 30 hypertensive patients age  $\geq 18$  years, with EH (n=15) or RVH (n=15), and with serum creatinine  $< 2.5$ mg/dL to participate in studies<sup>1,2</sup> between January 2008 and September 2012. Renal artery stenosis in patients with RVH was defined as cross-sectional luminal obstruction  $>60\%$  by computed tomography (CT) or magnetic resonance (MR) angiography, or Doppler velocities  $\geq 300$  cm/sec.<sup>3</sup> Exclusion criteria included uncontrolled hypertension [systolic blood pressure  $> 180$  mm Hg despite antihypertensive therapy], diabetes requiring medications, recent cardiovascular events (myocardial infarction, stroke, congestive heart failure within 6 months), pregnancy, and kidney transplant. A 3-day inpatient protocol in the clinical research unit included regulated dietary sodium intake (150 mEq/d), an isocaloric diet, MR imaging studies on Day 2, and CT scanning on Day 3.<sup>1</sup> Antihypertensive medications were continued; for uniformity, all patients were treated with either angiotensin-converting enzyme inhibitors or angiotensin receptors blockers.

### **Clinical data collection and blood pressure measurement**

Clinical data collected by physical examination or via the electrical medical records included age, sex, height, weight, body mass index, and use of concomitant medications. We calculated estimated glomerular filtration rate (eGFR) using the Chronic Kidney Epidemiology Collaboration (CKD-EPI) equation.<sup>4</sup> Blood pressure was measured by automated oscillometric recording (Omron, Kyoto, Japan), averaging 3 measurements at 5, 7, and 9 minutes after a 5-minute rest. Urine samples were collected for 24 hours in all hypertensive patients, while spot urine samples were obtained from HV. Samples were stored at  $-80^{\circ}\text{C}$  until measurement.

## **EV purification**

EV were isolated from urine using Total Exosome Isolation reagent<sup>®</sup> (Invitrogen, Waltham, MA, USA) according to manufacturer's guidelines. In brief, urine samples (1000  $\mu$ L) were centrifuged at 2000g for 30 minutes at 4<sup>°</sup>C to remove cells and debris. Supernatants (800  $\mu$ L) were mixed with 1 volume of the Total Exosome Isolation reagent<sup>®</sup> and incubated for 1 hour at room temperature. After incubation, samples were centrifuged at 10,000g for 1 hour at 4<sup>°</sup>C. Pelleted EVs were re-suspended in PBS.<sup>5</sup>

## **Measurement of miRs**

Total RNA was isolated from urinary exosome by the mirVana PARIS total RNA isolation kit (Life Technologies Cat. # AM1556) following the manufacturer's protocol. Briefly, for endogenous small RNA control, we added Cel-mir-39 (25 fmol, Life Technology, Cat. # 4464066) into each sample, as previously described.<sup>6</sup> A fixed RNA content of 4.8 ng of RNA elute was reverse transcribed by using the TaqMan MicroRNA reverse transcription kit (Life Technologies, Cat.# 4366596). For quantitative real-time polymerase chain reaction (qRT-PCR), 1.33  $\mu$ L of RT product was combined with 10 $\mu$ L of TaqMan universal master mix (Cat.# 4440038), 7.67 $\mu$ L of H<sub>2</sub>O and 1 $\mu$ L of primers, including miR-21, miR-92a, miR-93, miR-126, miR-148a, miR-192, miR-200b, miR-377 and miR-433 (Life Technologies, Cat. # 4427975, assay ID: 000397, 002137, 001090, 000451, 002134, 002272, 002251, 002181, 001028, respectively), to make up a 20  $\mu$ L reaction. qRT-PCR was carried out on an Applied Biosystems ViiA7 Real-Time PCR system at 50<sup>°</sup>C for 2 min, 95<sup>°</sup>C for 10 min and 40 cycles of 95<sup>°</sup>C for 15s and 60<sup>°</sup>C for 1 min. To generate standard curves, miR mimics were run together with the samples, to calculate absolute numbers of copies of target genes in the samples. These mimics included (all purchased from Life Technology): miR-21 (MC10206), miR-92a (MC12696), miR-

93 (MC10951), miR-126 (MC10401), miR-192 (MC12893), miR-200b (MC10492), miR-148a (MC12683), miR-377 (MC12860) and miR-433 (MC10774). We then normalized these data using a median normalization procedure.<sup>7</sup> Briefly, the median values obtained from cel-mir-39 Ct values of all the samples were used to calculate the normalization factor= $2^{(\text{median cel-mir-39 Ct value} - \text{average Ct value of the given sample})}$ . The number of the copies of a given miR in each sample was then divided by the normalization factor to generate the normalized copies of genes in each sample.

These miRs were selected because of their postulated involvement in renal fibrosis and/or angiogenesis. miR-92a and miR-126 regulate angiogenesis; miR-21 regulates cell death in ischemia; miR-200 regulates nephrosclerosis; and the remaining miRs regulate renal fibrosis.

## References

1. Glociczki ML, Glockner JF, Crane JA, et al. Blood oxygen level-dependent magnetic resonance imaging identifies cortical hypoxia in severe renovascular disease. *Hypertension*. 2011;58(6):1066-1072.
2. Saad A, Herrmann SM, Crane J, et al. Stent revascularization restores cortical blood flow and reverses tissue hypoxia in atherosclerotic renal artery stenosis but fails to reverse inflammatory pathways or glomerular filtration rate. *Circ Cardiovasc Interv*. 2013;6(4):428-435.
3. Murphy TP, Cooper CJ, Dworkin LD, et al. The Cardiovascular Outcomes with Renal Atherosclerotic Lesions (CORAL) study: rationale and methods. *J Vasc Interv Radiol*. 2005;16(10):1295-1300.
4. Levey AS, Stevens LA, Schmid CH, et al. A new equation to estimate glomerular filtration rate. *Ann Intern Med*. 2009;150(9):604-612.
5. Zerlinger E, Li M, Barta T, et al. Methods for the extraction and RNA profiling of exosomes. *World J Methodol*. 2013;3(1):11-18.
6. Park MY, Herrmann SM, Saad A, et al. Circulating and renal vein levels of microRNAs in patients with renal artery stenosis. *Nephrol Dial Transplant*. 2015;30(3):480-490.
7. Mitchell PS, Parkin RK, Kroh EM, et al. Circulating microRNAs as stable blood-based markers for cancer detection. *Proc Natl Acad Sci U S A*. 2008;105(30):10513-10518.

Figure a: Levels of miRs adjusted for estimated glomerular filtration (eGFR), systolic blood pressure (SBP), triglycerides, high-density lipoprotein, and albuminuria in urinary extracellular vesicles (EVs) of healthy volunteers (HV), renovascular hypertension (RVH) and essential hypertension (EH) patients. Each point represents the relative level of miRs after normalization using Cel-miR-39. Levels of miR-126, 148, 192, 377 and 433 were not significantly different among the groups.

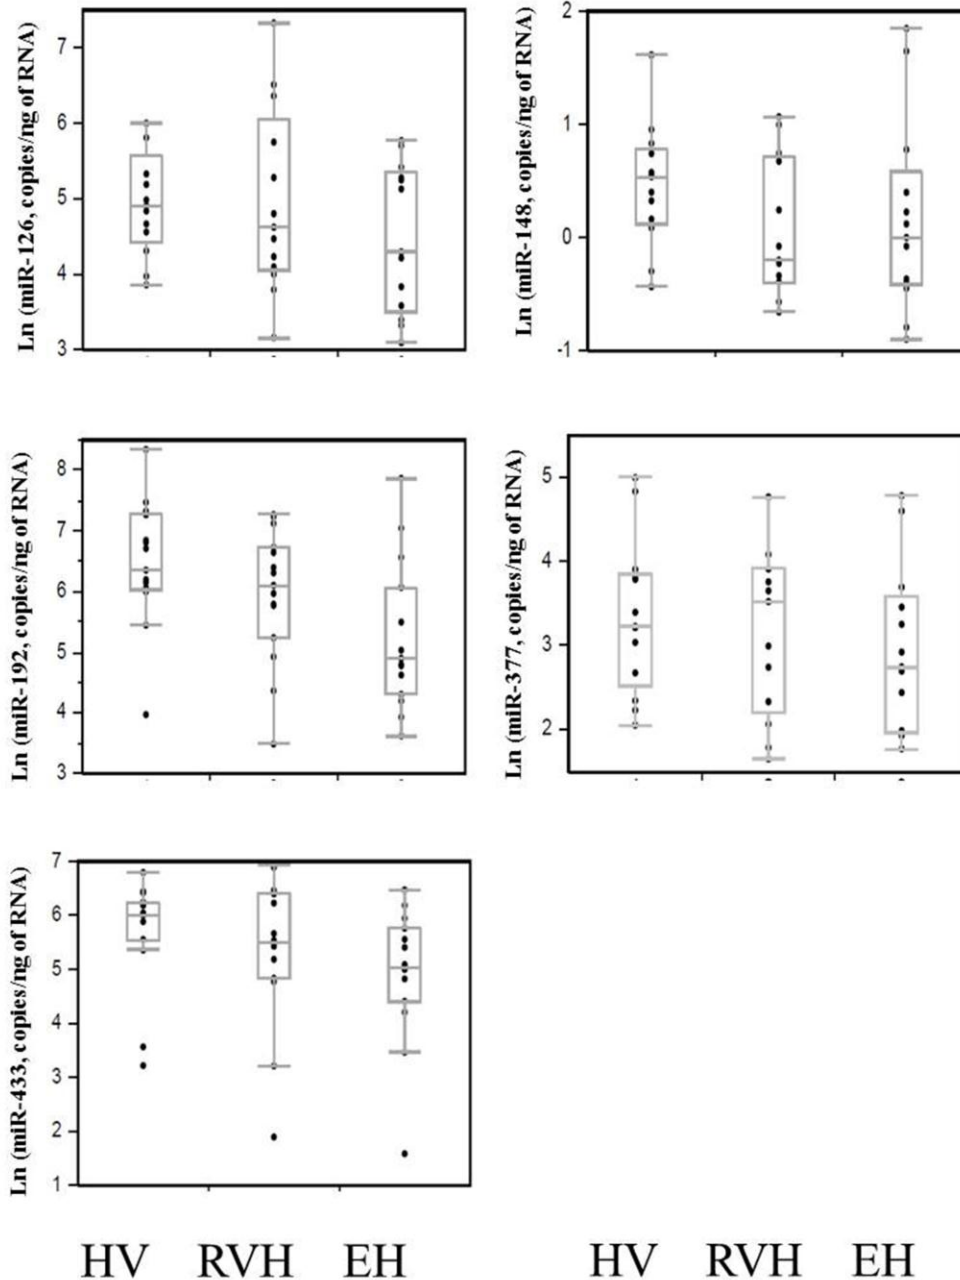

Table a. Partial Pearson correlation analysis between miR and clinical variables.

|                                      | miR-21 |         | miR-92a |         | miR-93 |         | miR-126 |         | miR-148 |         | miR-192 |         | miR-200b |         | miR-377 |         | miR -433 |         |
|--------------------------------------|--------|---------|---------|---------|--------|---------|---------|---------|---------|---------|---------|---------|----------|---------|---------|---------|----------|---------|
|                                      | r      | P-value | r       | P-value | r      | P-value | r       | P-value | r       | P-value | r       | P-value | r        | P-value | r       | P-value | r        | p-Value |
| Age (years)                          | -0.1   | 0.1     | 0.1     | 0.3     | 0.6    | 0.8     | -0.1    | 0.3     | 0.4     | 0.3     | 0.002   | 0.8     | -0.5     | 0.8     | 0.1     | 0.3     | 0.5      | 0.4     |
| BMI (kg/m <sup>2</sup> )             | -0.1   | 0.6     | 0.2     | 0.1     | 0.2    | 0.1     | 0.1     | 0.2     | 0.2     | 0.1     | 0.09    | 0.6     | 0.04     | 0.6     | 0.1     | 0.3     | 0.2      | 0.1     |
| SBP (mmHg)                           | -0.1   | 0.4     | -0.2    | 0.3     | -0.4   | 0.1     | -0.2    | 0.4     | -0.01   | 0.6     | -0.2    | 0.1     | -0.2     | 0.3     | -0.1    | 0.4     | -0.2     | 0.2     |
| DBP (mmHg)                           | -0.07  | 0.8     | 0.2     | 0.1     | 0.05   | 0.6     | 0.3     | 0.8     | 0.1     | 0.4     | 0.2     | 0.1     | 0.03     | 0.6     | 0.1     | 0.5     | 0.2      | 0.5     |
| eGFR<br>(mL/min/1.73m <sup>2</sup> ) | -0.3   | 0.09    | -0.2    | 0.2     | -0.3   | 0.09    | -0.3    | 0.09    | 0.1     | 0.2     | -0.1    | 0.3     | -0.2     | 0.1     | 0.2     | 0.1     | -0.2     | 0.2     |
| Urinary micro-<br>albumin (µg/mL)    | -0.05  | 0.5     | -0.1    | 0.3     | 0.08   | 0.2     | 0.01    | 0.7     | -0.1    | 0.7     | -0.6    | 0.1     | 0.1      | 0.09    | -0.6    | 0.7     | 0.03     | 0.3     |

Age, BMI, SBP, DBP, total cholesterol, high-density lipoprotein, low-density lipoprotein, eGFR and urinary microalbumin were adjusted in the analysis. Abbreviations: BMI, body mass index; SBP, systolic blood pressure; DBP, diastolic blood pressure; eGFR, estimated glomerular filtration rate
